# Supplementary material for: Linear α-olefin production with Na-promoted Fe–Zn catalysts via Fischer–Tropsch synthesis
Source: Royal Society of Chemistry journal article supplement (doi:10.1039/c9ra02471a), 2019-01-01
Supplement: c9ra02471a1.pdf [file c9ra02471a1.pdf]

Supporting information

Table S1. Comparison of catalytic activity for Fe catalysts in a packed-bed reactor.

| Catalysts                                                                 | Feedstock composition                                   | P (MPa) | T (°C) | WHSV (mL g <sub>cat</sub> <sup>-1</sup> h <sup>-1</sup> ) <sup>a</sup> | CO conversion (%) | CO <sub>2</sub> selectivity (%) | Hydrocarbon distribution (%) |       |      | Olefin selectivity in C2-C4 (%) | $\alpha$ | Ref.          |
|---------------------------------------------------------------------------|---------------------------------------------------------|---------|--------|------------------------------------------------------------------------|-------------------|---------------------------------|------------------------------|-------|------|---------------------------------|----------|---------------|
|                                                                           |                                                         |         |        |                                                                        |                   |                                 | CH <sub>4</sub>              | C2-C4 | C5+  |                                 |          |               |
| Na <sub>0.2</sub> /Fe <sub>1</sub> Zn <sub>1.2</sub> O <sub>x</sub> (400) | 24% CO, 64% H <sub>2</sub> , 8% CO <sub>2</sub> , 4% Ar | 2.0     | 340    | 36,000                                                                 | 76.7              | 31.6                            | 15.4                         | 33.5  | 51.1 | 87.1                            | 0.8      | In this study |
| Fe-Zn-0.81Na (Zn/Fe = 1)                                                  | 24% CO, 64% H <sub>2</sub> , 8% CO <sub>2</sub> , 4% Ar | 2.0     | 340    | 60,000                                                                 | 77.2              | 23.8                            | 12.7                         | 34.0  | 53.3 | 87.8                            | 0.7      | 28            |
| 100Fe/33Mn/28Na                                                           | 22.2% CO, 77.8% H <sub>2</sub>                          | 1.0     | 325    | (2,000)                                                                | 96.2              | 26.8                            | 16.7                         | 39.1  | 44.2 | 78.2                            | -        | 30            |
| 10 wt% Fe/CNT (Na/Fe = 0.1)                                               | 33.3% CO, 66.7% H <sub>2</sub>                          | 2.0     | 300    | 16,000                                                                 | 75.3              | 39.4                            | 3.4                          | 21.4  | 75.2 | 84.6                            | -        | 32            |
| 10 wt%Fe/SiO <sub>2</sub> (d <sub>p</sub> = 50 nm)                        | 32.3% CO, 67.7% H <sub>2</sub>                          | 2.0     | 300    | 16,200                                                                 | 33.8              | 12.2                            | 15.8                         | 29.3  | 54.9 | 54.3                            | -        | 44            |
| 10 wt% Fe/CNF                                                             | 45% CO, 45% H <sub>2</sub> , 10% He                     | 2.0     | 340    | (1,500)                                                                | 88.0              | 42.0                            | 23.0                         | 65.0  | 12.0 | 93.8                            | 0.4      | 51            |

<sup>a</sup>Data in parentheses represent the gas hourly space velocity (h<sup>-1</sup>).

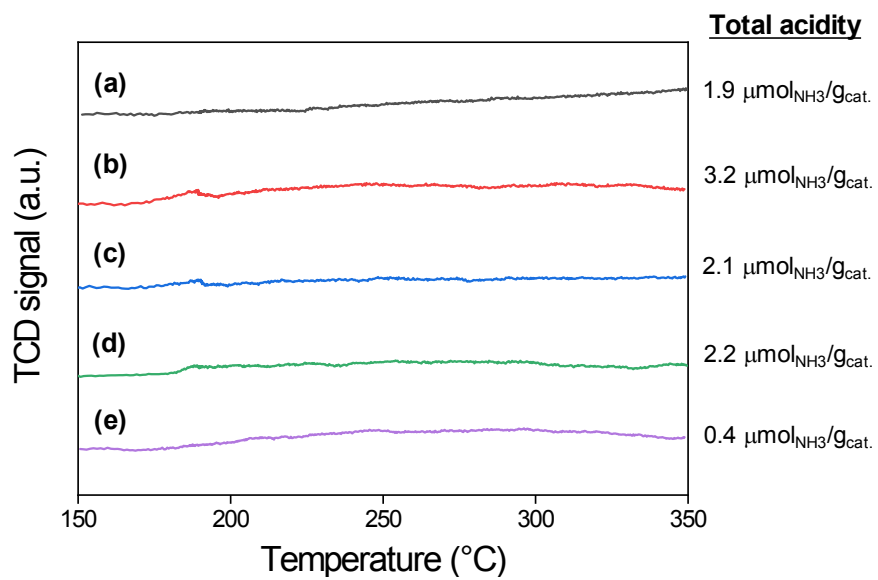

Fig. S1.  $\text{NH}_3$ -TPD patterns of (a)  $\text{Na}_{0.2}/\text{Fe}_1\text{Zn}_{1.2}\text{O}_x$  (350), (b)  $\text{Na}_{0.2}/\text{Fe}_1\text{Zn}_{1.2}\text{O}_x$  (400), (c)  $\text{Na}_{0.2}/\text{Fe}_1\text{Zn}_{1.2}\text{O}_x$  (500), (d)  $\text{Na}_{0.2}/\text{Fe}_1\text{Zn}_{1.2}\text{O}_x$  (600), (e)  $\text{Na}_{0.2}/\text{Fe}_1\text{Zn}_{1.2}\text{O}_x$  (700)

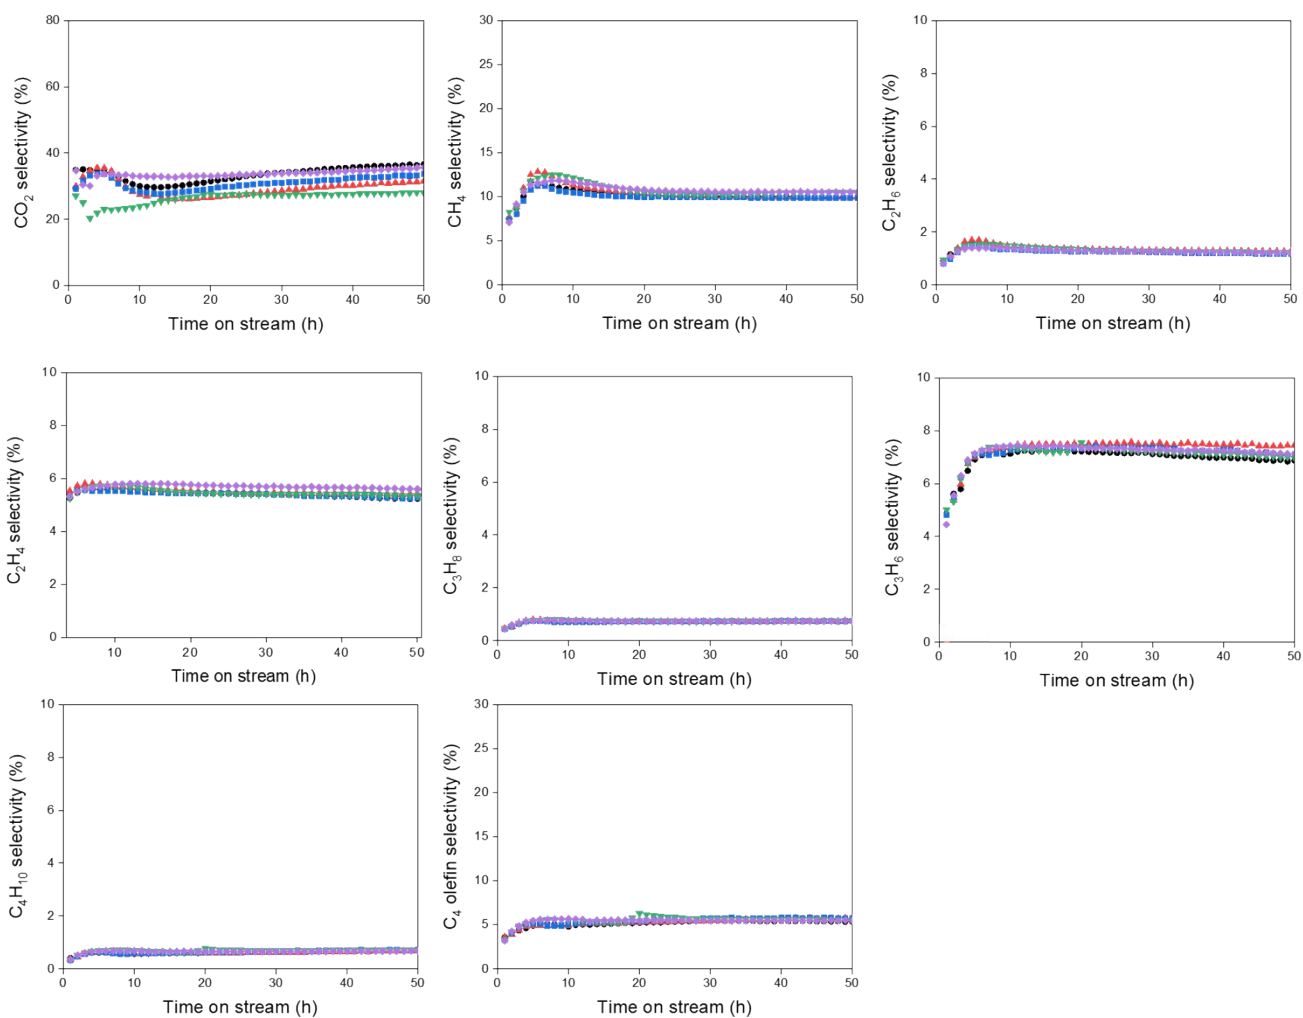

Fig. S2. Gas phase carbon selectivity for (●) Na<sub>0.2</sub>/Fe<sub>1</sub>Zn<sub>1.2</sub>O<sub>x</sub> (350), (▲) Na<sub>0.2</sub>/Fe<sub>1</sub>Zn<sub>1.2</sub>O<sub>x</sub> (400), (■) Na<sub>0.2</sub>/Fe<sub>1</sub>Zn<sub>1.2</sub>O<sub>x</sub> (500), (▼) Na<sub>0.2</sub>/Fe<sub>1</sub>Zn<sub>1.2</sub>O<sub>x</sub> (600), (◆) Na<sub>0.2</sub>/Fe<sub>1</sub>Zn<sub>1.2</sub>O<sub>x</sub> (700).

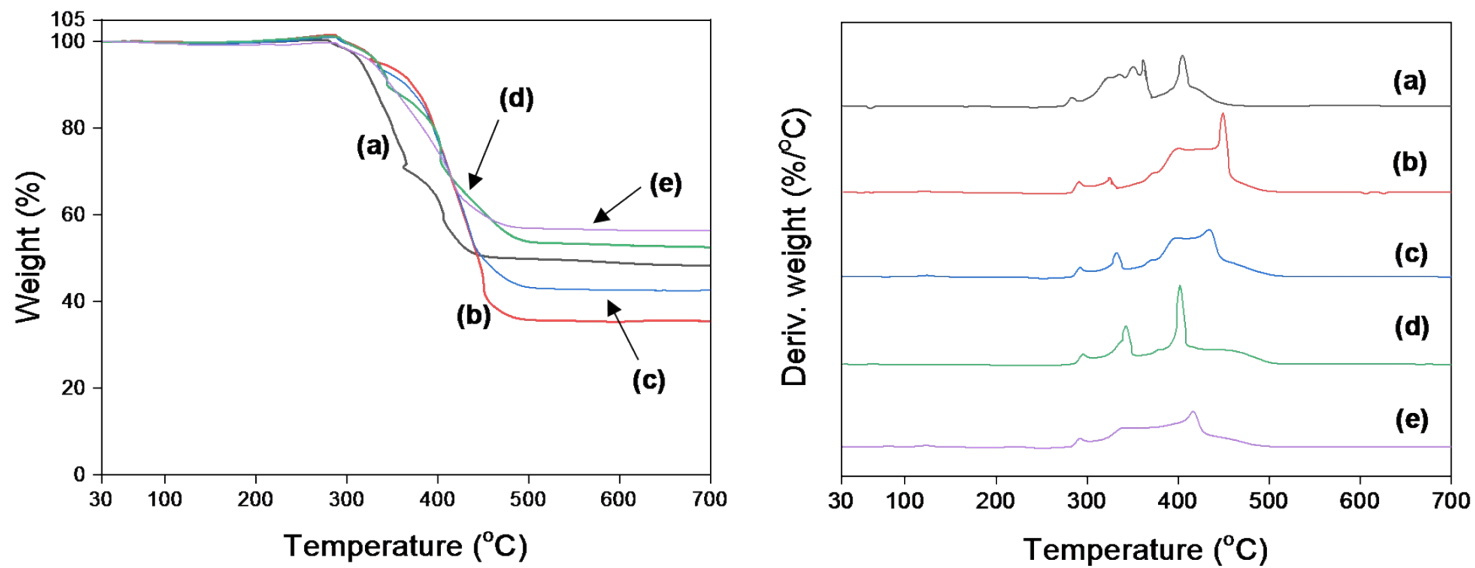

Fig. S3. TGA/DTG patterns of (a)  $\text{Na}_{0.2}/\text{Fe}_1\text{Zn}_{1.2}\text{O}_x$  (350), (b)  $\text{Na}_{0.2}/\text{Fe}_1\text{Zn}_{1.2}\text{O}_x$  (400), (c)  $\text{Na}_{0.2}/\text{Fe}_1\text{Zn}_{1.2}\text{O}_x$  (500), (d)  $\text{Na}_{0.2}/\text{Fe}_1\text{Zn}_{1.2}\text{O}_x$  (600), (e)  $\text{Na}_{0.2}/\text{Fe}_1\text{Zn}_{1.2}\text{O}_x$  (700) after 50 h of reaction.

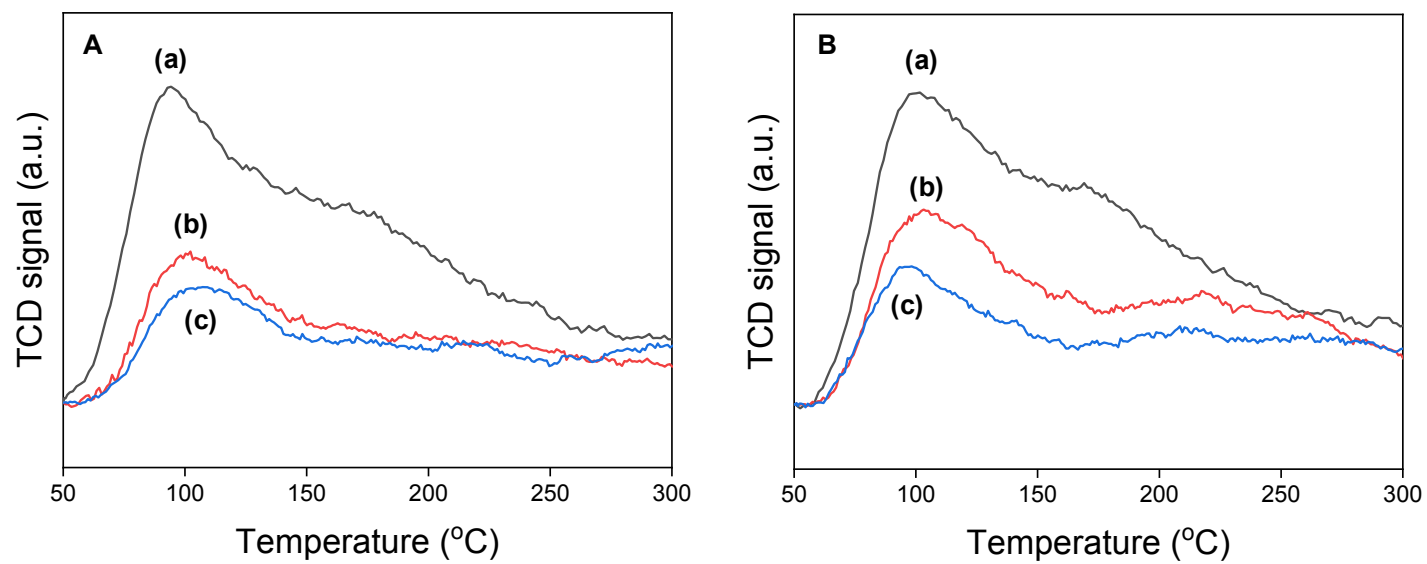

Fig. S4. CO<sub>2</sub>-TPD patterns of (A) Na<sub>0.2</sub>/Fe<sub>1</sub>Zn<sub>1.2</sub>O<sub>x</sub> (350), (B) Na<sub>0.2</sub>/Fe<sub>1</sub>Zn<sub>1.2</sub>O<sub>x</sub> (400) before (a) and after 30 h of reaction (b), and after 50 h of reaction (c).

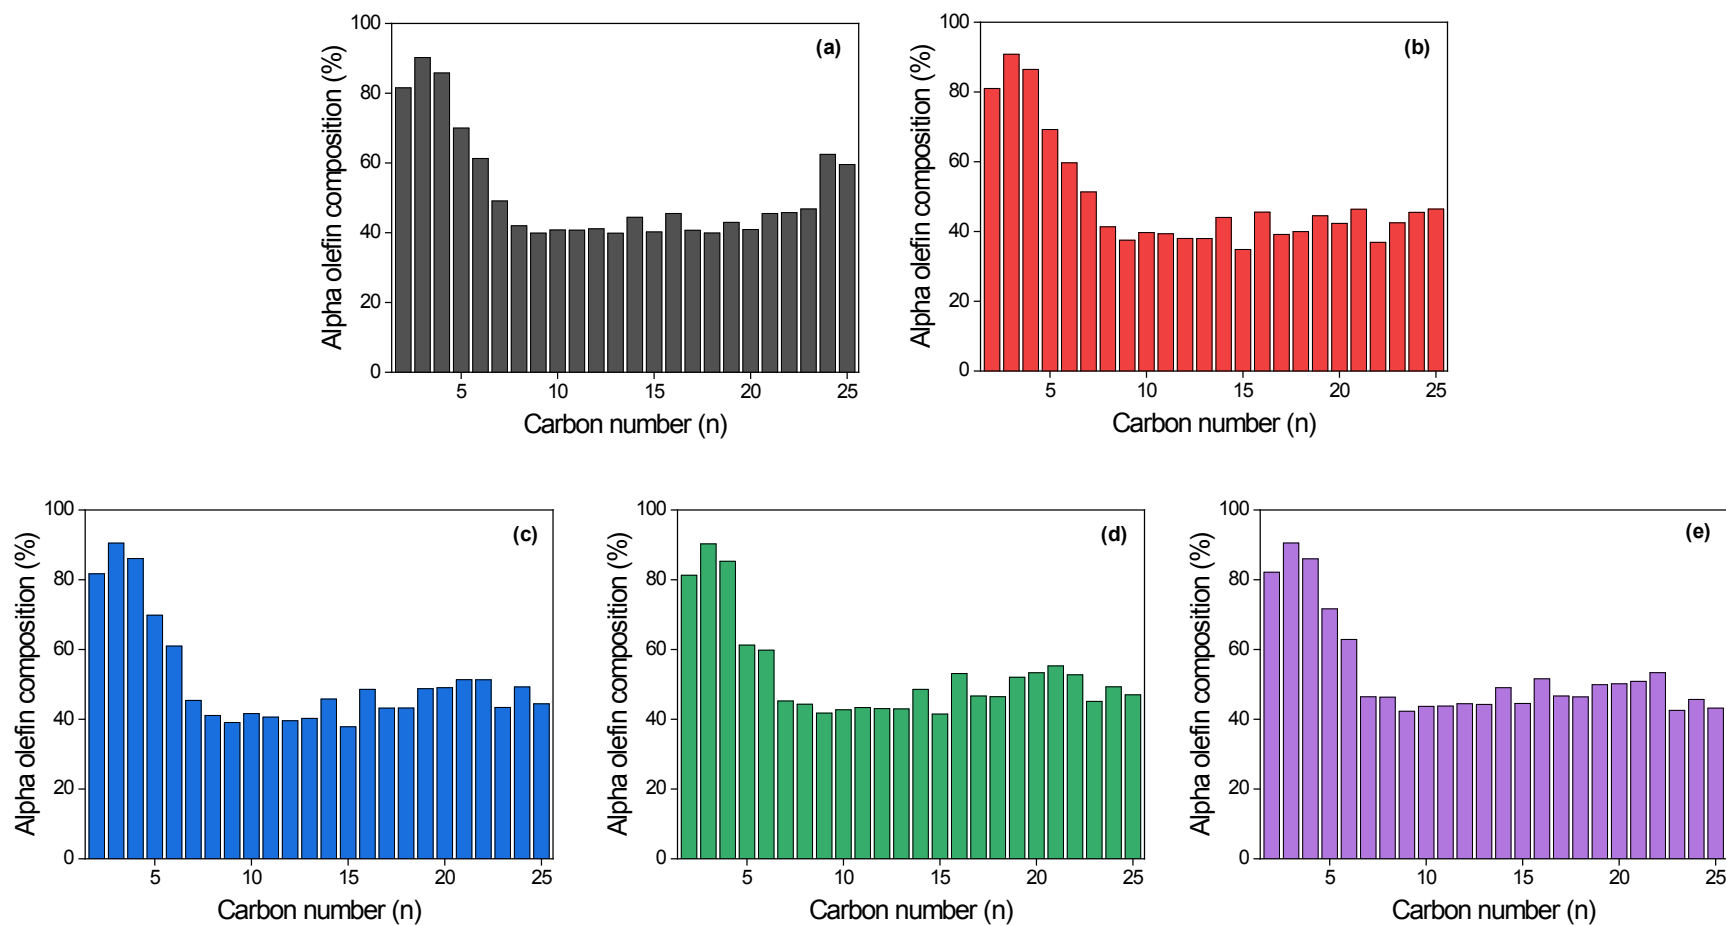

Fig. S5. Ratio of  $\alpha$ -olefin to carbon number of Na/Fe-Zn catalysts: (a)  $\text{Na}_{0.2}/\text{Fe}_1\text{Zn}_{1.2}\text{O}_x$  (350), (b)  $\text{Na}_{0.2}/\text{Fe}_1\text{Zn}_{1.2}\text{O}_x$  (400), (c)  $\text{Na}_{0.2}/\text{Fe}_1\text{Zn}_{1.2}\text{O}_x$  (500), (d)  $\text{Na}_{0.2}/\text{Fe}_1\text{Zn}_{1.2}\text{O}_x$  (600), (e)  $\text{Na}_{0.2}/\text{Fe}_1\text{Zn}_{1.2}\text{O}_x$  (700).
